# Supplementary material
Source: Preprints.org preprint supplement (doi:10.20944/preprints202011.0630.v1)

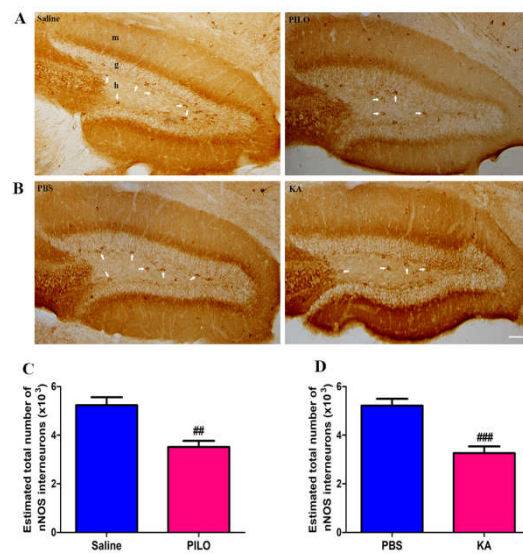

Figure 1

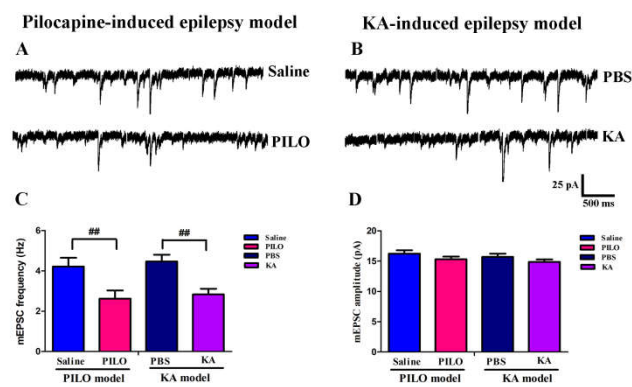

Figure 2

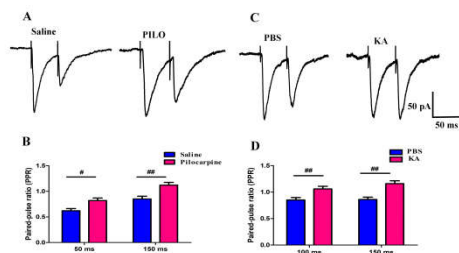

Figure 3

Supplement: Supplementary file 1 [file supplementary]
